# Supplementary material for: Synthesis and evaluation of the oil removal potential of 3-bromo-benzimidazolone polymer grafted silica gel
Source: Royal Society of Chemistry journal article supplement (doi:10.1039/d0ra10848k), 2021-01-01
Supplement: d0ra10848k1.pdf [file d0ra10848k1.pdf]

## Supplementary Material (ESI) FOR RSC Advances

### Synthesis and evaluation of the oil removal potential of 3-bromo-benzimidazolone polymer grafted silica gel

Oisaemi Uduagele Izevbehai,<sup>a\*</sup> Wilson Mugeru Gitari,<sup>a\*</sup> Nikita Tawanda Tavengwa,<sup>b</sup> Wasiu Babatunde Ayinde<sup>a</sup> and Rabelani Mudzielwana<sup>a</sup>

<sup>a</sup>Environmental Remediation and Nano Sciences Research Group, School of Environmental Sciences, University of Venda, Private Bag X5050, Thohoyandou 0950, South Africa.

<sup>b</sup>Department of Chemistry, University of Venda, Private Bag X5050, Thohoyandou 0950, South Africa.

#### Contents

1. RSM design and the actual values of responses
2. ANOVA for model and model terms

#### 1. RSM design and the actual values of responses.

| Run | Oil concentration (mg/L) | Sorbent dosage (g) | Contact time (h) | Percentage adsorption |
|-----|--------------------------|--------------------|------------------|-----------------------|
| 1   | 9250                     | 0.0026             | 38.2             | 97.1                  |
| 2   | 9250                     | 0.0045             | 38.2             | 97.9                  |
| 3   | 704                      | 0.0011             | 16.0             | 75.7                  |
| 4   | 9250                     | 0.0026             | 38.2             | 98.1                  |
| 5   | 704                      | 0.0040             | 60.5             | 75.5                  |
| 6   | 6650                     | 0.0011             | 60.5             | 96.7                  |
| 7   | 6650                     | 0.0040             | 60.5             | 96.0                  |
| 8   | 704                      | 0.0040             | 16.0             | 76.5                  |
| 9   | 7200                     | 0.0026             | 38.2             | 96.8                  |
| 10  | 9250                     | 0.0001             | 38.2             | 98.2                  |
| 11  | 9250                     | 0.0026             | 38.2             | 97.8                  |
| 12  | 6650                     | 0.0040             | 16.0             | 97.9                  |
| 13  | 9250                     | 0.0026             | 38.2             | 98.3                  |
| 14  | 9250                     | 0.0026             | 75.6             | 98.1                  |
| 15  | 704                      | 0.0011             | 60.5             | 75.7                  |
| 16  | 6650                     | 0.0011             | 16.0             | 97.4                  |
| 17  | 9250                     | 0.0026             | 38.2             | 98.2                  |
| 18  | 9250                     | 0.0026             | 38.2             | 98.2                  |

|    |      |        |      |      |
|----|------|--------|------|------|
| 19 | 9250 | 0.0026 | 0.85 | 97.7 |
| 20 | 192  | 0.0026 | 38.2 | 14.6 |

2. ANOVA for model and model terms.

| Source              | % Removal |          |
|---------------------|-----------|----------|
|                     | F-value   | p-value  |
| Model               | 561.73    | < 0.0001 |
| A-Oil concentration | 815.58    | < 0.0001 |
| B-sorbent dosage    | 0.2294    | 0.6434   |
| C-contact time      | 0.0189    | 0.8938   |
| AB                  | 0.6528    | 0.4400   |
| AC                  | 0.5746    | 0.4678   |
| BC                  | 2.15      | 0.1763   |
| A <sup>2</sup>      | 364.55    | < 0.0001 |
| B <sup>2</sup>      | 0.4508    | 0.5188   |
| C <sup>2</sup>      | 0.1251    | 0.7317   |
| Lack of fit         | 2.02      | 0.2296   |
